# Supplementary material for: Increased apoptotic sensitivity of glioblastoma enables therapeutic targeting by BH3-mimetics
Source: PubMed Central journal article supplement (PMC9525582; doi:10.1038/s41418-022-01001-3), 2022-04-26

# Source data

**Figure 1C**

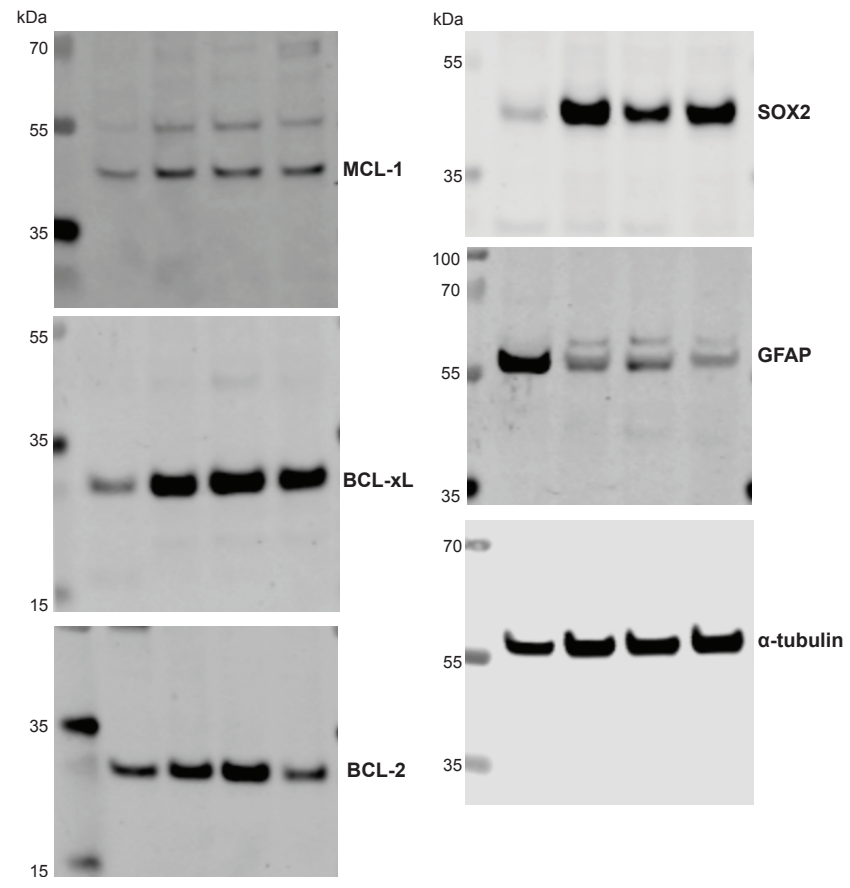

**Figure 3A**

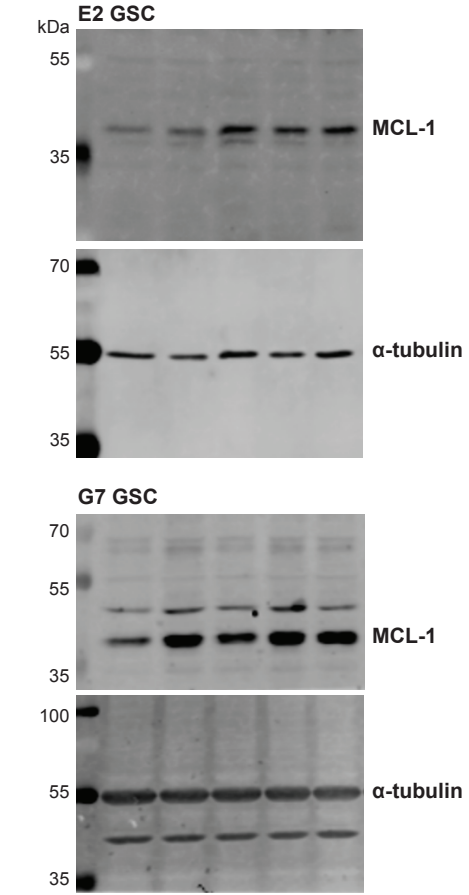

**Figure 3E**

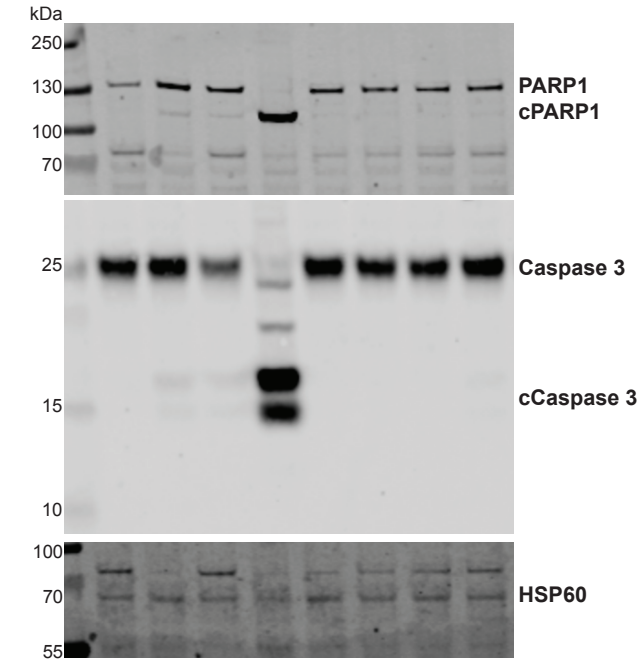

# Source data

**Figure 4B**

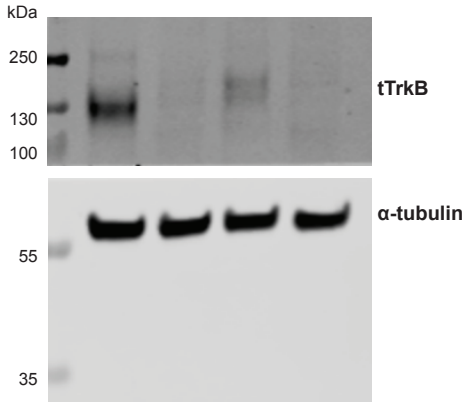

**Figure 6A**

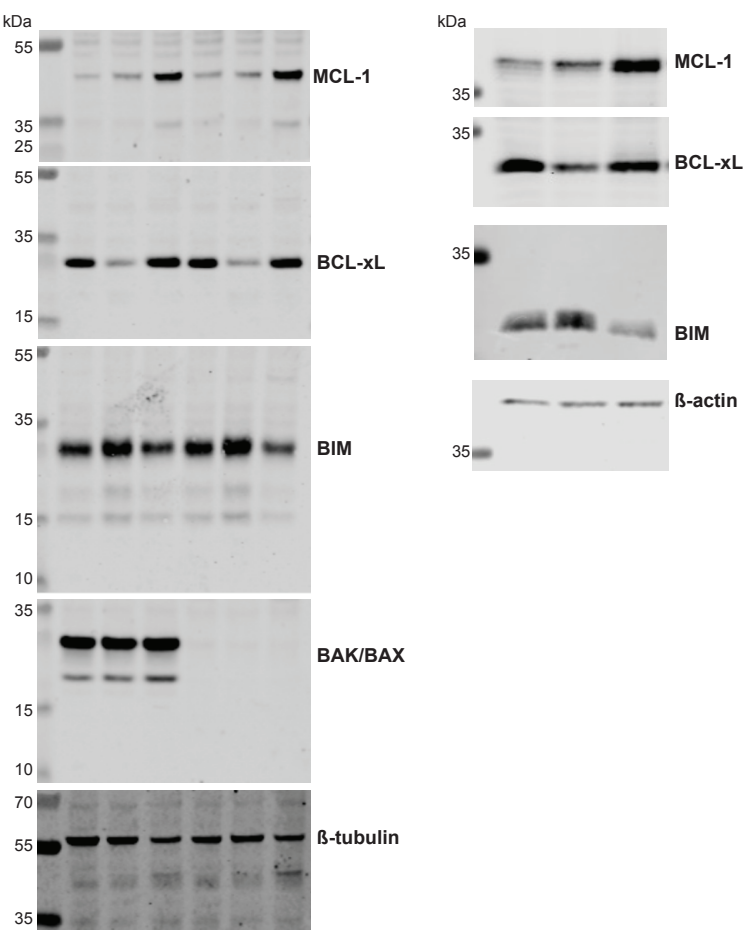

**Figure 4E**

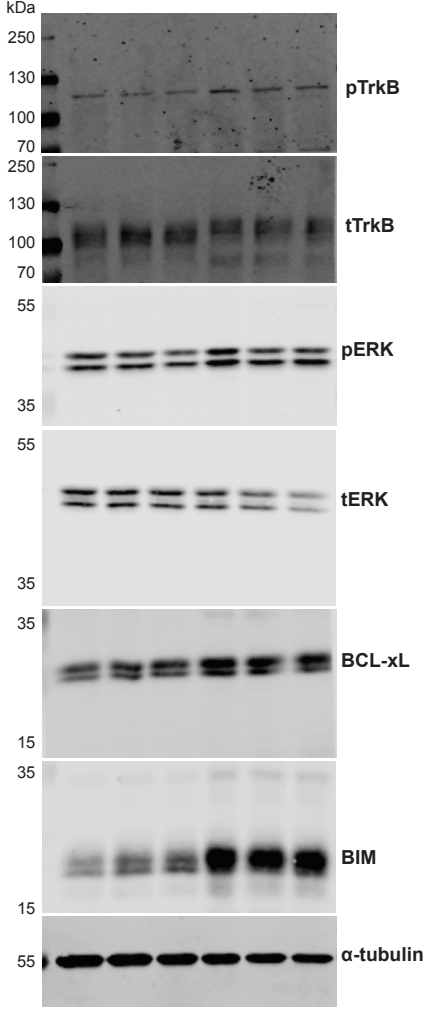

**Figure 6B**

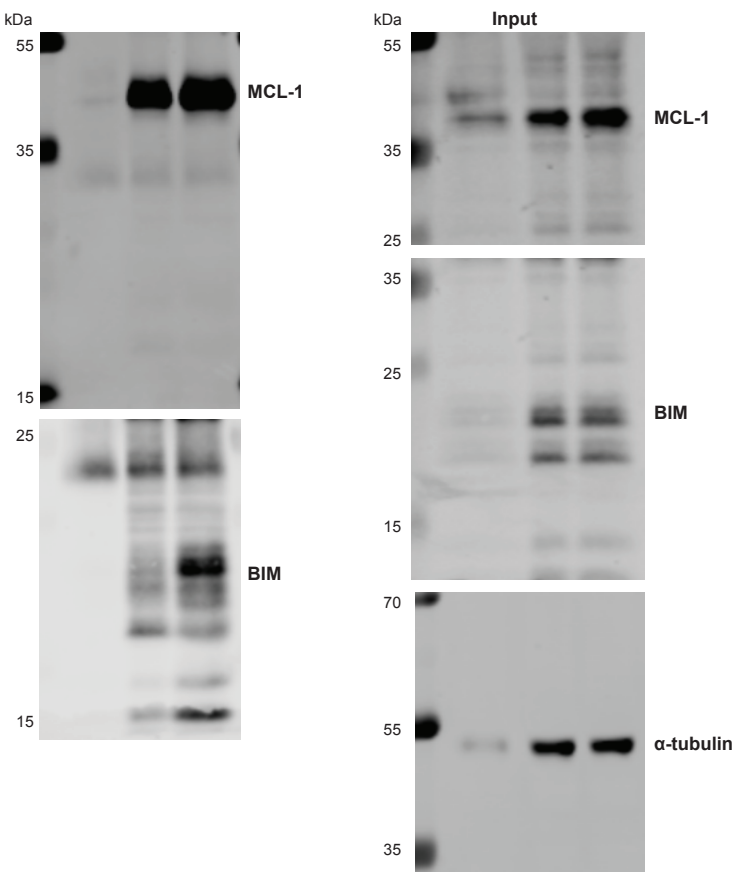

# Source data

**Supplementary Figure 2A**

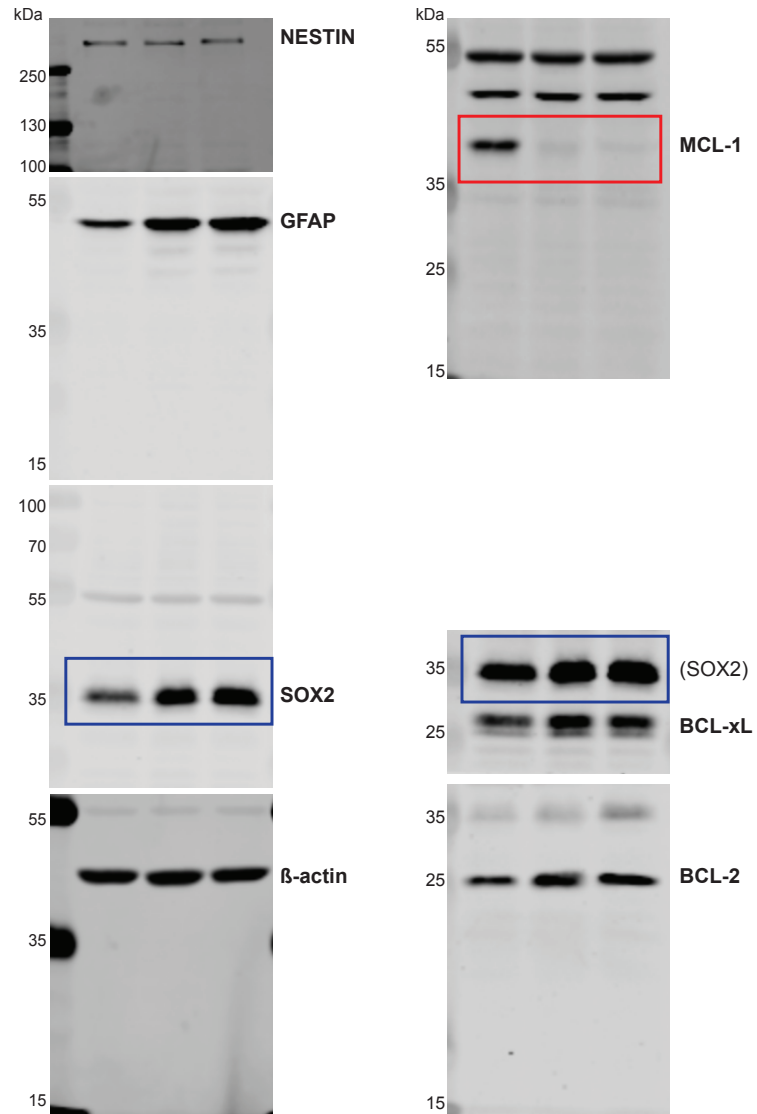

**Supplementary Figure 3H**

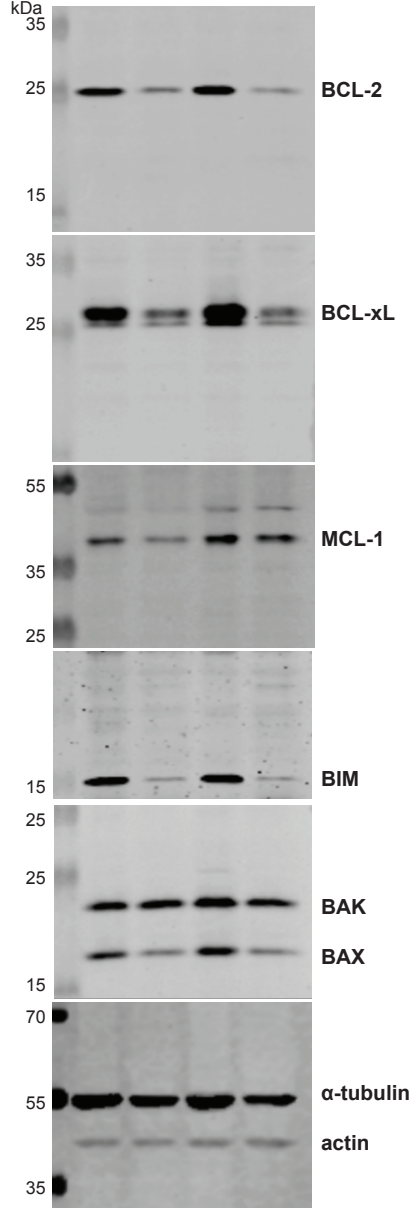

**Supplementary Figure 3D**

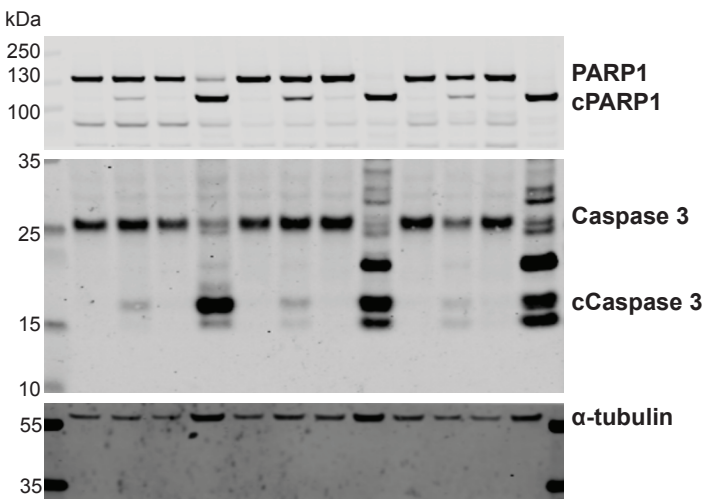

# Source data

## Supplementary Figure 4A

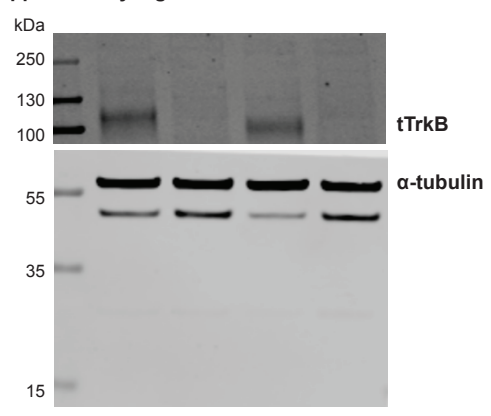

## Supplementary Figure 6A

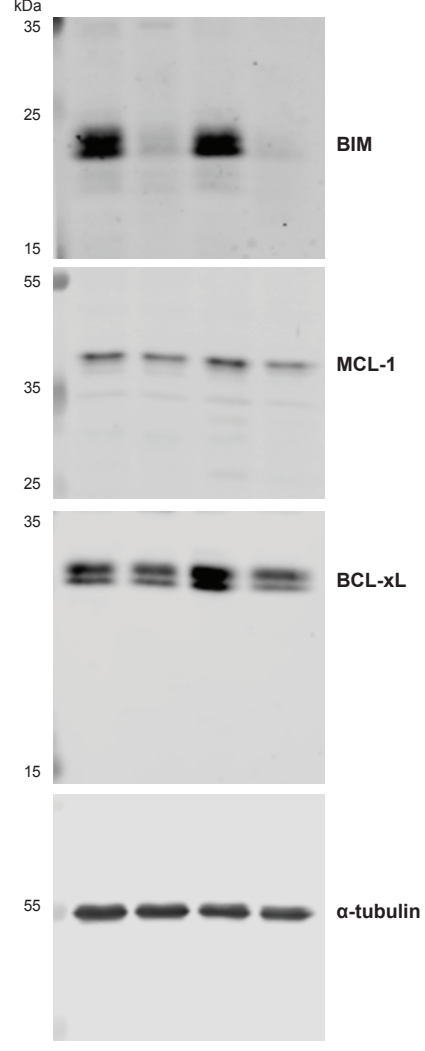

## Supplementary Figure 4C

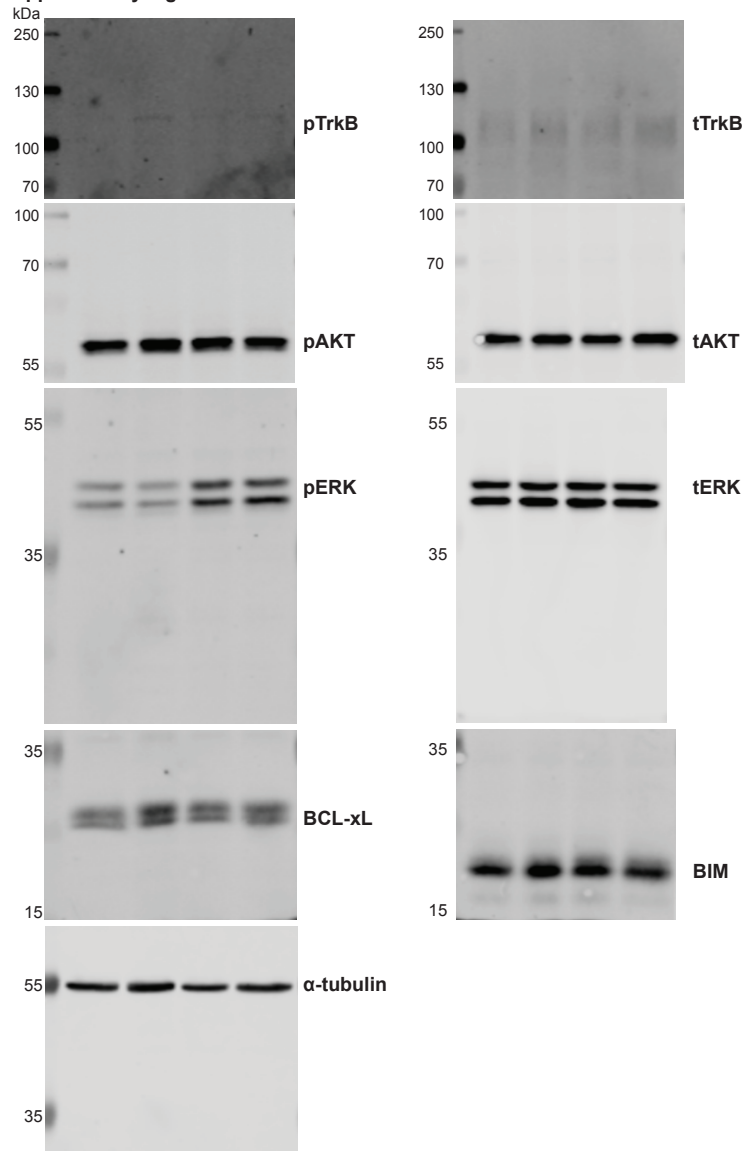

Supplement: 41418_2022_1001_MOESM7_ESM.pdf [file 41418_2022_1001_MOESM7_ESM.pdf]
